# Supplementary material for: Health Care Utilization Due to Substance Abuse Among Homeless and Nonhomeless Children and Young Adults in New York
Source: Atypon-hosted journal article supplement (doi:10.1176/appi.ps.202000010), 2021-04-01
Supplement: appi.ps.202000010.ds001.pdf [file appi.ps.202000010.ds001.pdf]

Online Supplemental Table 1. Sheltered and unsheltered homeless youths counts, 2013-2014

|                                                             | <b>Years</b> |             |             |
|-------------------------------------------------------------|--------------|-------------|-------------|
|                                                             | <b>Total</b> | <b>2013</b> | <b>2014</b> |
| <b>Total</b>                                                |              |             |             |
| Persons in Households without Children (Persons ages 18-24) | 7,071        | 3,407       | 3,664       |
| Persons in Households with at Least One Adult and One Child |              |             |             |
| Children Under Age 18                                       | 55,434       | 26,997      | 28,437      |
| Persons age 18 to 24                                        | 9,833        | 4,889       | 4,944       |
| Persons in Households with Only Children <sup>a</sup>       | 107,973      | 35,588      | 72,385      |
| <b>Sheltered</b>                                            |              |             |             |
| Persons in Households without Children (Persons ages 18-24) | 6,585        | 3,177       | 3,408       |
| Persons in Households with at Least One Adult and One Child |              |             |             |
| Children Under Age 18                                       | 55,319       | 26,920      | 28,399      |
| Persons age 18 to 24                                        | 9,803        | 4,870       | 4,933       |
| Persons in Households with Only Children <sup>a</sup>       | 107,923      | 35,547      | 72,376      |
| <b>Unsheltered</b>                                          |              |             |             |
| Persons in Households without Children (Persons ages 18-24) | 486          | 230         | 256         |
| Persons in Households with at Least One Adult and One Child |              |             |             |
| Children Under Age 18                                       | 115          | 77          | 38          |
| Persons age 18 to 24                                        | 30           | 19          | 11          |
| Persons in Households with Only Children <sup>a</sup>       | 50           | 41          | 9           |

<sup>a</sup> This category includes: persons under age 18, including children in one-child households, adolescent parents and their children, adolescent siblings, or other household configurations composed only of children

Information sources: 1) Department of Housing and Urban Development. HUD's continuum of care homeless assistance programs: homeless populations and subpopulations. 2013. 2) Department of Housing and Urban Development. HUD's continuum of care homeless assistance programs: homeless populations and subpopulations. 2014.

Online Supplemental Table 2. Clinical Classifications Software (CCS) Codes

| <b>CCS code</b> | <b>Description</b>                                                                         |
|-----------------|--------------------------------------------------------------------------------------------|
| 650             | Adjustment disorders, e.g., post-traumatic stress disorder                                 |
| 651             | Anxiety disorders                                                                          |
| 652             | Attention-deficit, conduct, and disruptive behavior disorders, e.g., suicide and self-harm |
| 655             | Disorders usually diagnosed in infancy, childhood, or adolescence                          |
| 656             | Impulse control disorders                                                                  |
| 657             | Mood disorders                                                                             |
| 658             | Personality disorders                                                                      |
| 659             | Schizophrenia and other psychotic disorders                                                |
| 662             | Suicide and intentional self-inflicted injury                                              |
| 663             | Screening and history of mental health and substance abuse codes                           |
| 670             | Miscellaneous disorders                                                                    |

Online Supplemental Table 3. Results from stratified regression model<sup>a</sup> to evaluate the association between homelessness and ICU utilization

|                                      | With opioid use |           |                | Other substance |            |                |
|--------------------------------------|-----------------|-----------|----------------|-----------------|------------|----------------|
|                                      | Estimate        | 95%CI     | <i>p-value</i> | Estimate        | 95%CI      | <i>p-value</i> |
| <b>ICU utilization<sup>b,c</sup></b> |                 |           |                |                 |            |                |
| Homeless (reference: Non-homeless)   | 2.47            | 0.98 6.23 | .06            | 7.17            | 3.79 13.59 | <.01           |

<sup>a</sup>Model was adjusted by age, race/ethnicity, insurance type, and mental health diagnosis, with fixed year effect and a hospital or ED random effect

<sup>b</sup>Logistic regression model used

<sup>c</sup>Discharge against medical advice was added to the model as a covariate

Online Supplemental Table 4. Results from regression models<sup>a</sup> to evaluate the association between homelessness and outcomes among youths <18 years old with substance-related health care utilization

| <b>Variable</b>                                         | <b>Estimate</b> | <b>95% CI</b> | <b>p</b> |
|---------------------------------------------------------|-----------------|---------------|----------|
| Homeless opioid-related utilization <sup>b</sup>        | 1.08            | .29–4.00      | .9       |
| Homeless total cost <sup>c,d</sup>                      | 6.75            | 5.50–38.28    | <.01     |
| Homeless length of stay <sup>d,e</sup>                  | 15.44           | 9.83–24.26    | <.01     |
| Homeless intensive care unit utilization <sup>b,c</sup> | 35.84           | 9.64–133.22   | <.01     |
| Homeless readmission or ED revisit <sup>b,c,f</sup>     | 1.36            | .31–5.85      | .7       |

<sup>a</sup>Reference group for all comparisons: nonhomeless. Models were adjusted by age, race-ethnicity, insurance type, and mental disorder diagnosis, with year fixed effect and a hospital or emergency department (ED) random effect.

<sup>b</sup>Logistic regression models were used.

<sup>c</sup>Discharged against medical advice was added to the model as a covariate

<sup>d</sup>Linear regression was used after log-transformation of cost.

<sup>e</sup>Negative binomial regression was used.

<sup>f</sup>Only patients who had personal identifiers were included in the model.
